# Supplementary material for: A Citizen Science Approach: A Detailed Ecological Assessment of Subtropical Reefs at Point Lookout, Australia
Source: PubMed Central journal article supplement (PMC5051685; doi:10.1371/journal.pone.0163407), 2016-10-05
Supplement: pone.0163407.s001.pdf [file pone.0163407.s001.pdf]

1 **S1 Table. Analysis of variance of significant models.**

| Family                     | Factor                               | Coeff             | p-value          |
|----------------------------|--------------------------------------|-------------------|------------------|
| Butterflyfishes<br>(log+1) | Flat_Rock_West-Flat_Rock_Eas         | 0.4492982         | 0.5884541        |
|                            | Manta_Ray_Bommie-Flat_Rock_East      | 0.1015718         | 0.9973177        |
|                            | Shag_Rock_East-Flat_Rock_            | 0.4964636         | 0.4913607        |
|                            | Shag_Rock_West-Flat_Rock_East        | 0.6194558         | 0.2696896        |
|                            | Manta_Ray_Bommie-Flat_Rock_West      | 0.5508700         | 0.3854406        |
|                            | <b>Shag_Rock_East-Flat_Rock_West</b> | <b>0.9457618</b>  | <b>0.0253080</b> |
|                            | <b>Shag_Rock_West-Flat_Rock</b>      | <b>1.0687540</b>  | <b>0.0082515</b> |
|                            | Shag_Rock_East-Manta_Ray_Bommie      | 0.3948918         | 0.6992631        |
|                            | Shag_Rock_West-Manta_Ray_Bommie      | 0.5178840         | 0.4485312        |
|                            | Shag_Rock_West-Shag_Rock_East        | 0.1229922         | 0.9943774        |
| Damselfishes               | <b>Spring-Autumn</b>                 | <b>-99.400000</b> | <b>0.0000396</b> |
|                            | <b>Summer-Autumn</b>                 | <b>-64.933333</b> | <b>0.0104633</b> |
|                            | <b>Winter-Autumn</b>                 | <b>-96.066667</b> | <b>0.0000713</b> |
|                            | Summer-Spring                        | 34.466667         | 0.3224935        |
|                            | Winter-Spring                        | 3.333333          | 0.9983393        |
|                            | Winter-Summer                        | -31.133333        | 0.4124560        |
| Surgeonfishes<br>(log+1)   | <b>Spring-Autumn</b>                 | <b>-1.0493601</b> | <b>0.0022700</b> |
|                            | <b>Summer-Autumn</b>                 | <b>-0.6915394</b> | <b>0.0748936</b> |
|                            | <b>Winter-Autumn</b>                 | <b>-1.3447479</b> | <b>0.0000673</b> |
|                            | Summer-Spring                        | 0.3578207         | 0.5787179        |
|                            | Winter-Spring                        | -0.2953878        | 0.7165026        |
|                            | Winter-Summer                        | -0.6532085        | 0.1015445        |

2
